# Supplementary material for: A rapid method to increase transparency and efficiency in web-based searches
Source: Springer Nature journal article supplement (doi:10.1186/s13750-016-0079-2), 2017-01-03
Supplement: MOESM2 [file 13750_2016_79_MOESM2_ESM.docx]

**How to Generate Google Scholar URLs**

*Software Needed:*

Spreadsheet management software (e.g. Excel)

*Overview:*

This guide explains how to use an Excel workbook to automatically generate a list of URLs of search results based on entry of a set search string. This list of URLs can then be saved as a text file and used to download HTML files of search results, which can either be screened by hand or using scraping software with the local HTML files (e.g. Import.io). See other guides for instructions on how to do this.

*How-To:*

It is useful to trial a search string with the advanced Google Scholar search facility prior to downloading search results so that the total number of search results available can be estimated.

**Steps:**

1. Open up the workbook file and proceed to the tab entitled “Search String Input”.
2. Enter your search string using the blue boxes. Avoid copying and pasting to prevent errors in the formulae.
3. Enter the number of search results that you would like to extract.
4. Proceed to the tab entitled “URL Output”.
5. The viable URLs for all pages of the Google Scholar search results will be displayed in column C. Copy and paste the displayed URLs and save as a text file using a new workbook in Excel or specialist text editing software.
6. This text file can then be used with DownThemAll! to download all search result pages as HTML files, which can then be extracted into a bibliographic database using Import.io.

[
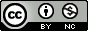
](http://creativecommons.org/licenses/by-nc/4.0/)
This work is licensed under a [Creative Commons Attribution-NonCommercial 4.0 International License](http://creativecommons.org/licenses/by-nc/4.0/).
